# Supplementary material
Source: ML conference proceedings conference paper supplement (https://openreview.net/forum?id=Tt3XLyuDrE)
Supplement: supplementary_material [file Supp_broader_impact.pdf › Supp_broader_impact.pdf]

---

# Transformer brain encoders explain human high-level visual responses

---

Anonymous Author(s)

Affiliation

Address

email

## 1 Broader impact

2 This research offers several broader societal impacts by advancing our understanding of how the brain  
3 dynamically routes visual information. By modeling attention-based routing mechanisms inspired by  
4 transformer architectures, this work contributes to the development of more biologically grounded and  
5 interpretable artificial intelligence systems. These insights could lead to more adaptable and efficient  
6 AI applications in areas such as healthcare, education, and autonomous systems. In neuroscience and  
7 clinical research, the model may offer new perspectives on disorders involving disrupted visual or  
8 attentional processing, potentially informing early diagnosis or therapeutic strategies. Additionally,  
9 the model's ability to predict brain activity in naturalistic settings has implications for improving  
10 brain-computer interfaces, enabling more intuitive assistive technologies for individuals with motor or  
11 sensory impairments. The inherent interpretability of attention routing further supports transparency  
12 and trust in neuro-AI systems used in socially sensitive applications.
